# Supplementary material
Source: publisher site journal article supplement (https://www.spandidos-publications.com/2446/downloadSupplementary)
Supplement: Supplementary file 1 [file downloadSupplementary]

## Sheet: Supp table 6
Table SVI. Site of mutation subgroup analysis.
Gene	χ2 P-value by site of mutation
	Lymph node	Lung	Bone	Soft tissue
GNAS	0.096	0.069	0.39	>0.5
MET	>0.5	>0.5	>0.5	>0.5
MYC	0.17	>0.5	0.09	0.27
PTEN	>0.5	0.056	>0.5	>0.5
